# Supplementary material for: Audiovisual cues must be predictable and win-paired to drive risky choice
Source: eLife. 2026 Apr 13;14:RP105951. doi: 10.7554/eLife.105951 (PMC13075936; doi:10.7554/eLife.105951)
Supplement: Supplementary file 1. [file elife-105951-supp1.docx]

| **Table A: P1-P4 choice comparisons**  **Tukey HSD** | | | | |
| --- | --- | --- | --- | --- |
| **Task comparison** | | | **Mean difference** | **Significance** |
| **P1** | Uncued | Standard | **0.17** | 0.007 |
| Reverse | *0.14* | 0.06 |
| Outcome | **0.18** | 0.006 |
| Random | 0.09 | 0.45 |
| Loss | 0.08 | 0.62 |
| Standard | Reverse | -0.03 | 1.00 |
| Outcome | 0.01 | 1.00 |
| Random | -0.08 | 0.62 |
| Loss | -0.09 | 0.45 |
| Reverse | Outcome | 0.04 | 0.98 |
| Random | -0.05 | 0.93 |
| Loss | -0.06 | 0.83 |
| Outcome | Random | -0.09 | 0.54 |
| Loss | -0.10 | 0.38 |
| Random | Loss | -0.01 | 1.00 |
| **P2** | Uncued | Standard | 0.20 | 0.52 |
| Reverse | 0.06 | 1.00 |
| Outcome | 0.21 | 0.48 |
| Random | -0.07 | 0.99 |
| Loss | -0.20 | 0.52 |
| Standard | Reverse | -0.14 | 0.85 |
| Outcome | 0.01 | 1.00 |
| Random | -0.27 | 0.20 |
| Loss | **-0.40** | 0.01 |
| Reverse | Outcome | 0.15 | 0.81 |
| Random | -0.13 | 0.89 |
| Loss | -0.26 | 0.28 |
| Outcome | Random | -0.28 | 0.19 |
| Loss | **-0.41** | 0.01 |
| Random | Loss | -0.13 | 0.90 |
| **P3** | Uncued | Standard | -0.16 | 0.47 |
| Reverse | -0.20 | 0.26 |
| Outcome | **-0.35** | 0.004 |
| Random | -0.04 | 0.99 |
| Loss | 0.08 | 0.95 |
| Standard | Reverse | -0.04 | 0.99 |
| Outcome | -0.19 | 0.35 |
| Random | 0.13 | 0.76 |
| Loss | 0.25 | 0.10 |
|  | Reverse | Outcome | -0.15 | 0.65 |
| Random | 0.17 | 0.53 |
| Loss | **0.29** | 0.04 |
| Outcome | Random | **0.32** | 0.02 |
| Loss | **0.44** | 0.0002 |
| Random | Loss | 0.12 | 0.82 |
| **P4** | Uncued | Standard | -0.14 | 0.37 |
| Reverse | 0.06 | 0.98 |
| Outcome | 0.02 | 1.00 |
| Random | 0.11 | 0.72 |
| Loss | 0.14 | 0.45 |
| Standard | Reverse | 0.20 | 0.09 |
| Outcome | 0.16 | 0.28 |
| Random | **0.25** | 0.01 |
| Loss | **0.28** | 0.004 |
| Reverse | Outcome | -0.04 | 0.99 |
| Random | 0.05 | 0.99 |
| Loss | 0.08 | 0.90 |
| Outcome | Random | 0.09 | 0.86 |
| Loss | 0.12 | 0.63 |
| Random | Loss | 0.03 | 0.99 |

Table A: Comparisons of P1-P4 between task variants using Tukey’s honest significant differences (HSD) test. Bolded values indicate a significant difference, italicized values indicate a trending difference.

| **Table B: Premature responding comparisons**  **Tukey HSD** | | | | |
| --- | --- | --- | --- | --- |
| **Task comparison** | | | **Mean difference** | **Significance** |
|  | Uncued | Standard | -0.02 | 1.00 |
| Reverse | 0.08 | 0.16 |
| Outcome | -0.03 | 0.96 |
| Random | **0.10** | 0.02 |
| Loss | **0.24** | <0.0001 |
| Standard | Reverse | **0.10** | 0.05 |
| Outcome | -0.01 | 1.00 |
| Random | **0.12** | 0.005 |
| Loss | **0.25** | <0.0001 |
| Reverse | Outcome | **-0.11** | 0.02 |
| Random | 0.02 | 0.98 |
| Loss | **0.16** | <0.0001 |
| Outcome | Random | **0.13** | 0.002 |
| Loss | **0.27** | <0.0001 |
| Random | Loss | **0.13** | 0.001 |

Table B: Comparisons of premature responding between task variants using Tukey’s HSD test. Bolded values indicate a significant difference.

| **Table C: Collect latency comparisons**  **Tukey HSD** | | | | |
| --- | --- | --- | --- | --- |
| **Task comparison** | | | **Mean difference** | **Significance** |
|  | Uncued | Standard | 0.13 | 0.93 |
| Reverse | 0.05 | 1.00 |
| Outcome | -0.09 | 0.99 |
| Random | **-0.72** | <0.0001 |
| Loss | -0.02 | 1.00 |
| Standard | Reverse | -0.08 | 0.99 |
| Outcome | -0.21 | 0.61 |
| Random | **-0.84** | <0.0001 |
| Loss | -0.14 | 0.90 |
| Reverse | Outcome | -0.13 | 0.93 |
| Random | **-0.76** | <0.0001 |
| Loss | -0.06 | 1.00 |
| Outcome | Random | **-0.63** | 0.0002 |
| Loss | 0.07 | 1.00 |
| Random | Loss | **0.70** | <0.0001 |

Table C: Comparisons of collect latency between task variants using Tukey’s HSD test. Bolded values indicate a significant difference.

| **Table D: Nonlinear model simulated decision score comparisons**  **Tukey HSD** | | | | |
| --- | --- | --- | --- | --- |
| **Task comparison** | | | **Mean difference** | **Significance** |
|  | Uncued | Standard | **43.58** | 0.002 |
| Reverse | 29.40 | 0.12 |
| Outcome | **36.04** | 0.03 |
| Random | 5.22 | 0.99 |
| Loss | 4.72 | 0.99 |
| Standard | Reverse | -14.18 | 0.77 |
| Outcome | -7.55 | 0.98 |
| Random | **-38.37** | 0.006 |
| Loss | **-38.86** | 0.005 |
| Reverse | Outcome | 6.63 | 0.99 |
| Random | -24.19 | 0.25 |
| Loss | -24.68 | 0.23 |
| Outcome | Random | *-30.82* | 0.08 |
| Loss | *-31.32* | 0.07 |
| Random | Loss | -0.50 | 0.99 |

Table D: Comparisons of decision scores simulated from nonlinear model subject-level parameter estimates using Tukey’s HSD test. Bolded values indicate a significant difference, italicized values indicate a trending difference.

| **Table E: Scaled + offset model simulated decision score comparisons**  **Tukey HSD** |
| --- |

| **Task comparison** | | | **Mean difference** | **Significance** |
| --- | --- | --- | --- | --- |
|  | Uncued | Standard | **36.63** | 0.01 |
| Reverse | 26.86 | 0.18 |
| Outcome | *32.53* | 0.07 |
| Random | 5.52 | 0.99 |
| Loss | 6.02 | 0.99 |
| Standard | Reverse | -9.77 | 0.94 |
| Outcome | -4.10 | 0.99 |
| Random | **-31.10** | 0.04 |
| Loss | **-30.61** | 0.05 |
| Reverse | Outcome | 5.67 | 0.99 |
| Random | -21.34 | 0.37 |
| Loss | -20.84 | 0.40 |
| Outcome | Random | -27.00 | 0.16 |
| Loss | -26.51 | 0.18 |
| Random | Loss | 0.50 | 0.99 |

| Table E: Comparisons of decision scores simulated from scaled + offset model subject-level parameter estimates using Tukey’s HSD test. Bolded values indicate a significant difference.   | **Table F: Nonlinear model simulated P1-P4 choice comparisons Tukey HSD** | | | | | | --- | --- | --- | --- | --- | | **Task comparison** | | | **Mean difference** | **Significance** | | **P1** | Uncued | Standard | **0.30** | <0.0001 | | Reverse | 0.17 | 0.09 | | Outcome | **0.24** | 0.01 | | Random | 0.15 | 0.18 | | Loss | 0.03 | 0.99 | | Standard | Reverse | -0.13 | 0.26 | | Outcome | -0.07 | 0.89 | | Random | -0.15 | 0.13 | | Loss | **-0.27** | <0.0001 | | Reverse | Outcome | 0.06 | 0.92 | | Random | -0.02 | 1.00 | | Loss | -0.14 | 0.24 | | Outcome | Random | -0.08 | 0.78 | | Loss | **-0.20** | 0.02 | | Random | Loss | -0.12 | 0.40 | | **P2** | Uncued | Standard | -0.02 | 1.00 | | Reverse | 0.02 | 1.00 | | Outcome | -0.01 | 1.00 | | Random | -0.10 | 0.58 | | Loss | -0.01 | 1.00 | | Standard | Reverse | 0.04 | 0.98 | | Outcome | 0.01 | 1.00 | | Random | -0.08 | 0.73 | | Loss | 0.01 | 1.00 | | Reverse | Outcome | -0.03 | 1.00 | | Random | -0.12 | 0.33 | | Loss | -0.03 | 1.00 | | Outcome | Random | -0.10 | 0.65 | | Loss | 0.00 | 1.00 | | Random | Loss | 0.10 | 0.61 | | **P3** | Uncued | Standard | **-0.17** | 0.001 | | Reverse | -0.08 | 0.39 | | Outcome | **-0.15** | 0.01 | | Random | -0.02 | 1.00 | | Loss | -0.03 | 0.96 | | Standard | Reverse | 0.09 | 0.17 | | Outcome | 0.02 | 1.00 | | Random | **0.15** | 0.001 | | Loss | **0.13** | 0.01 | | Reverse | Outcome | -0.07 | 0.46 | | Random | 0.06 | 0.60 | | Loss | 0.04 | 0.86 | | Outcome | Random | **0.14** | 0.01 | | Loss | **0.12** | 0.04 | | Random | Loss | -0.02 | 1.00 | | **P4** | Uncued | Standard | **-0.19** | 0.004 | | Reverse | -0.12 | 0.19 | | Outcome | **-0.16** | 0.04 | | Random | -0.02 | 1.00 | | Loss | -0.03 | 0.99 | | Standard | Reverse | 0.07 | 0.73 | | Outcome | 0.03 | 0.99 | | Random | **0.17** | 0.01 | | Loss | **0.16** | 0.01 | | Reverse | Outcome | -0.04 | 0.97 | | Random | 0.10 | 0.39 | | Loss | 0.09 | 0.43 | | Outcome | Random | 0.14 | 0.09 | | Loss | 0.13 | 0.10 | | Random | Loss | 0.00 | 1.00 |   Table F: Comparisons of P1-P4 simulated from nonlinear model subject-level parameter estimates using Tukey’s HSD test. Bolded values indicate a significant difference. |
| --- | --- | --- | --- | --- | --- | --- | --- | --- | --- | --- | --- | --- | --- | --- | --- | --- | --- | --- | --- | --- | --- | --- | --- | --- | --- | --- | --- | --- | --- | --- | --- | --- | --- | --- | --- | --- | --- | --- | --- | --- | --- | --- | --- | --- | --- | --- | --- | --- | --- | --- | --- | --- | --- | --- | --- | --- | --- | --- | --- | --- | --- | --- | --- | --- | --- | --- | --- | --- | --- | --- | --- | --- | --- | --- | --- | --- | --- | --- | --- | --- | --- | --- | --- | --- | --- | --- | --- | --- | --- | --- | --- | --- | --- | --- | --- | --- | --- | --- | --- | --- | --- | --- | --- | --- | --- | --- | --- | --- | --- | --- | --- | --- | --- | --- | --- | --- | --- | --- | --- | --- | --- | --- | --- | --- | --- | --- | --- | --- | --- | --- | --- | --- | --- | --- | --- | --- | --- | --- | --- | --- | --- | --- | --- | --- | --- | --- | --- | --- | --- | --- | --- | --- | --- | --- | --- | --- | --- | --- | --- | --- | --- | --- | --- | --- | --- | --- | --- | --- | --- | --- | --- | --- | --- | --- | --- | --- | --- | --- | --- | --- | --- | --- | --- | --- | --- | --- | --- | --- | --- | --- | --- | --- | --- | --- | --- | --- | --- | --- | --- | --- | --- | --- | --- | --- | --- | --- | --- | --- | --- | --- | --- | --- | --- | --- |
|  |
|  |

| **Table G: Scaled + offset model simulated P1-P4 choice comparisons**  **Tukey HSD** | | | | |
| --- | --- | --- | --- | --- |
| **Task comparison** | | | **Mean difference** | **Significance** |
| **P1** | Uncued | Standard | **0.25** | 0.001 |
| Reverse | **0.18** | 0.04 |
| Outcome | **0.20** | 0.02 |
| Random | 0.15 | 0.18 |
| Loss | 0.02 | 1.00 |
| Standard | Reverse | -0.07 | 0.85 |
| Outcome | -0.05 | 0.96 |
| Random | -0.10 | 0.47 |
| Loss | **-0.23** | 0.002 |
| Reverse | Outcome | 0.02 | 1.00 |
| Random | -0.04 | 0.99 |
| Loss | *-0.16* | 0.08 |
| Outcome | Random | -0.06 | 0.95 |
| Loss | **-0.18** | 0.04 |
| Random | Loss | -0.13 | 0.30 |
| **P2** | Uncued | Standard | -0.01 | 1.00 |
| Reverse | 0.00 | 1.00 |
| Outcome | 0.00 | 1.00 |
| Random | -0.09 | 0.73 |
| Loss | 0.01 | 1.00 |
| Standard | Reverse | 0.01 | 1.00 |
| Outcome | 0.02 | 1.00 |
| Random | -0.08 | 0.78 |
| Loss | 0.03 | 1.00 |
| Reverse | Outcome | 0.01 | 1.00 |
| Random | -0.09 | 0.71 |
| Loss | 0.02 | 1.00 |
| Outcome | Random | -0.10 | 0.68 |
| Loss | 0.01 | 1.00 |
| Random | Loss | 0.11 | 0.56 |
| **P3** | Uncued | Standard | **-0.14** | 0.02 |
| Reverse | -0.11 | 0.15 |
| Outcome | **-0.15** | 0.02 |
| Random | -0.01 | 1.00 |
| Loss | -0.05 | 0.89 |
| Standard | Reverse | 0.03 | 0.98 |
| Outcome | -0.01 | 1.00 |
| Random | **0.12** | 0.04 |
| Loss | 0.09 | 0.29 |
| Reverse | Outcome | -0.04 | 0.97 |
| Random | 0.10 | 0.25 |
| Loss | 0.06 | 0.73 |
| Outcome | Random | **0.13** | 0.04 |
| Loss | 0.10 | 0.26 |
| Random | Loss | -0.03 | 0.97 |
| **P4** | Uncued | Standard | **-0.17** | 0.009 |
| Reverse | -0.09 | 0.46 |
| Outcome | **-0.15** | 0.05 |
| Random | -0.03 | 0.99 |
| Loss | -0.04 | 0.97 |
| Standard | Reverse | 0.08 | 0.56 |
| Outcome | 0.02 | 1.00 |
| Random | **0.14** | 0.04 |
| Loss | *0.13* | 0.06 |
| Reverse | Outcome | -0.06 | 0.87 |
| Random | 0.06 | 0.81 |
| Loss | 0.05 | 0.89 |
| Outcome | Random | 0.12 | 0.18 |
| Loss | 0.11 | 0.25 |
| Random | Loss | -0.01 | 1.00 |

Table G: Comparisons of P1-P4 simulated from scaled + offset model subject-level parameter estimates using Tukey’s HSD test. Bolded values indicate a significant difference, italicized values indicate a trending difference.
